# Supplementary material for: An uncertainty metric to evaluate deformation vector fields for dose accumulation in radiotherapy
Source: PubMed Central journal article supplement — Phys Imaging Radiat Oncol. 2018 May 31;6:77–82. doi: 10.1016/j.phro.2018.05.005 (PMC7807581; doi:10.1016/j.phro.2018.05.005), 2018-05-31
Supplement: mmc2.pdf [file mmc2.pdf]

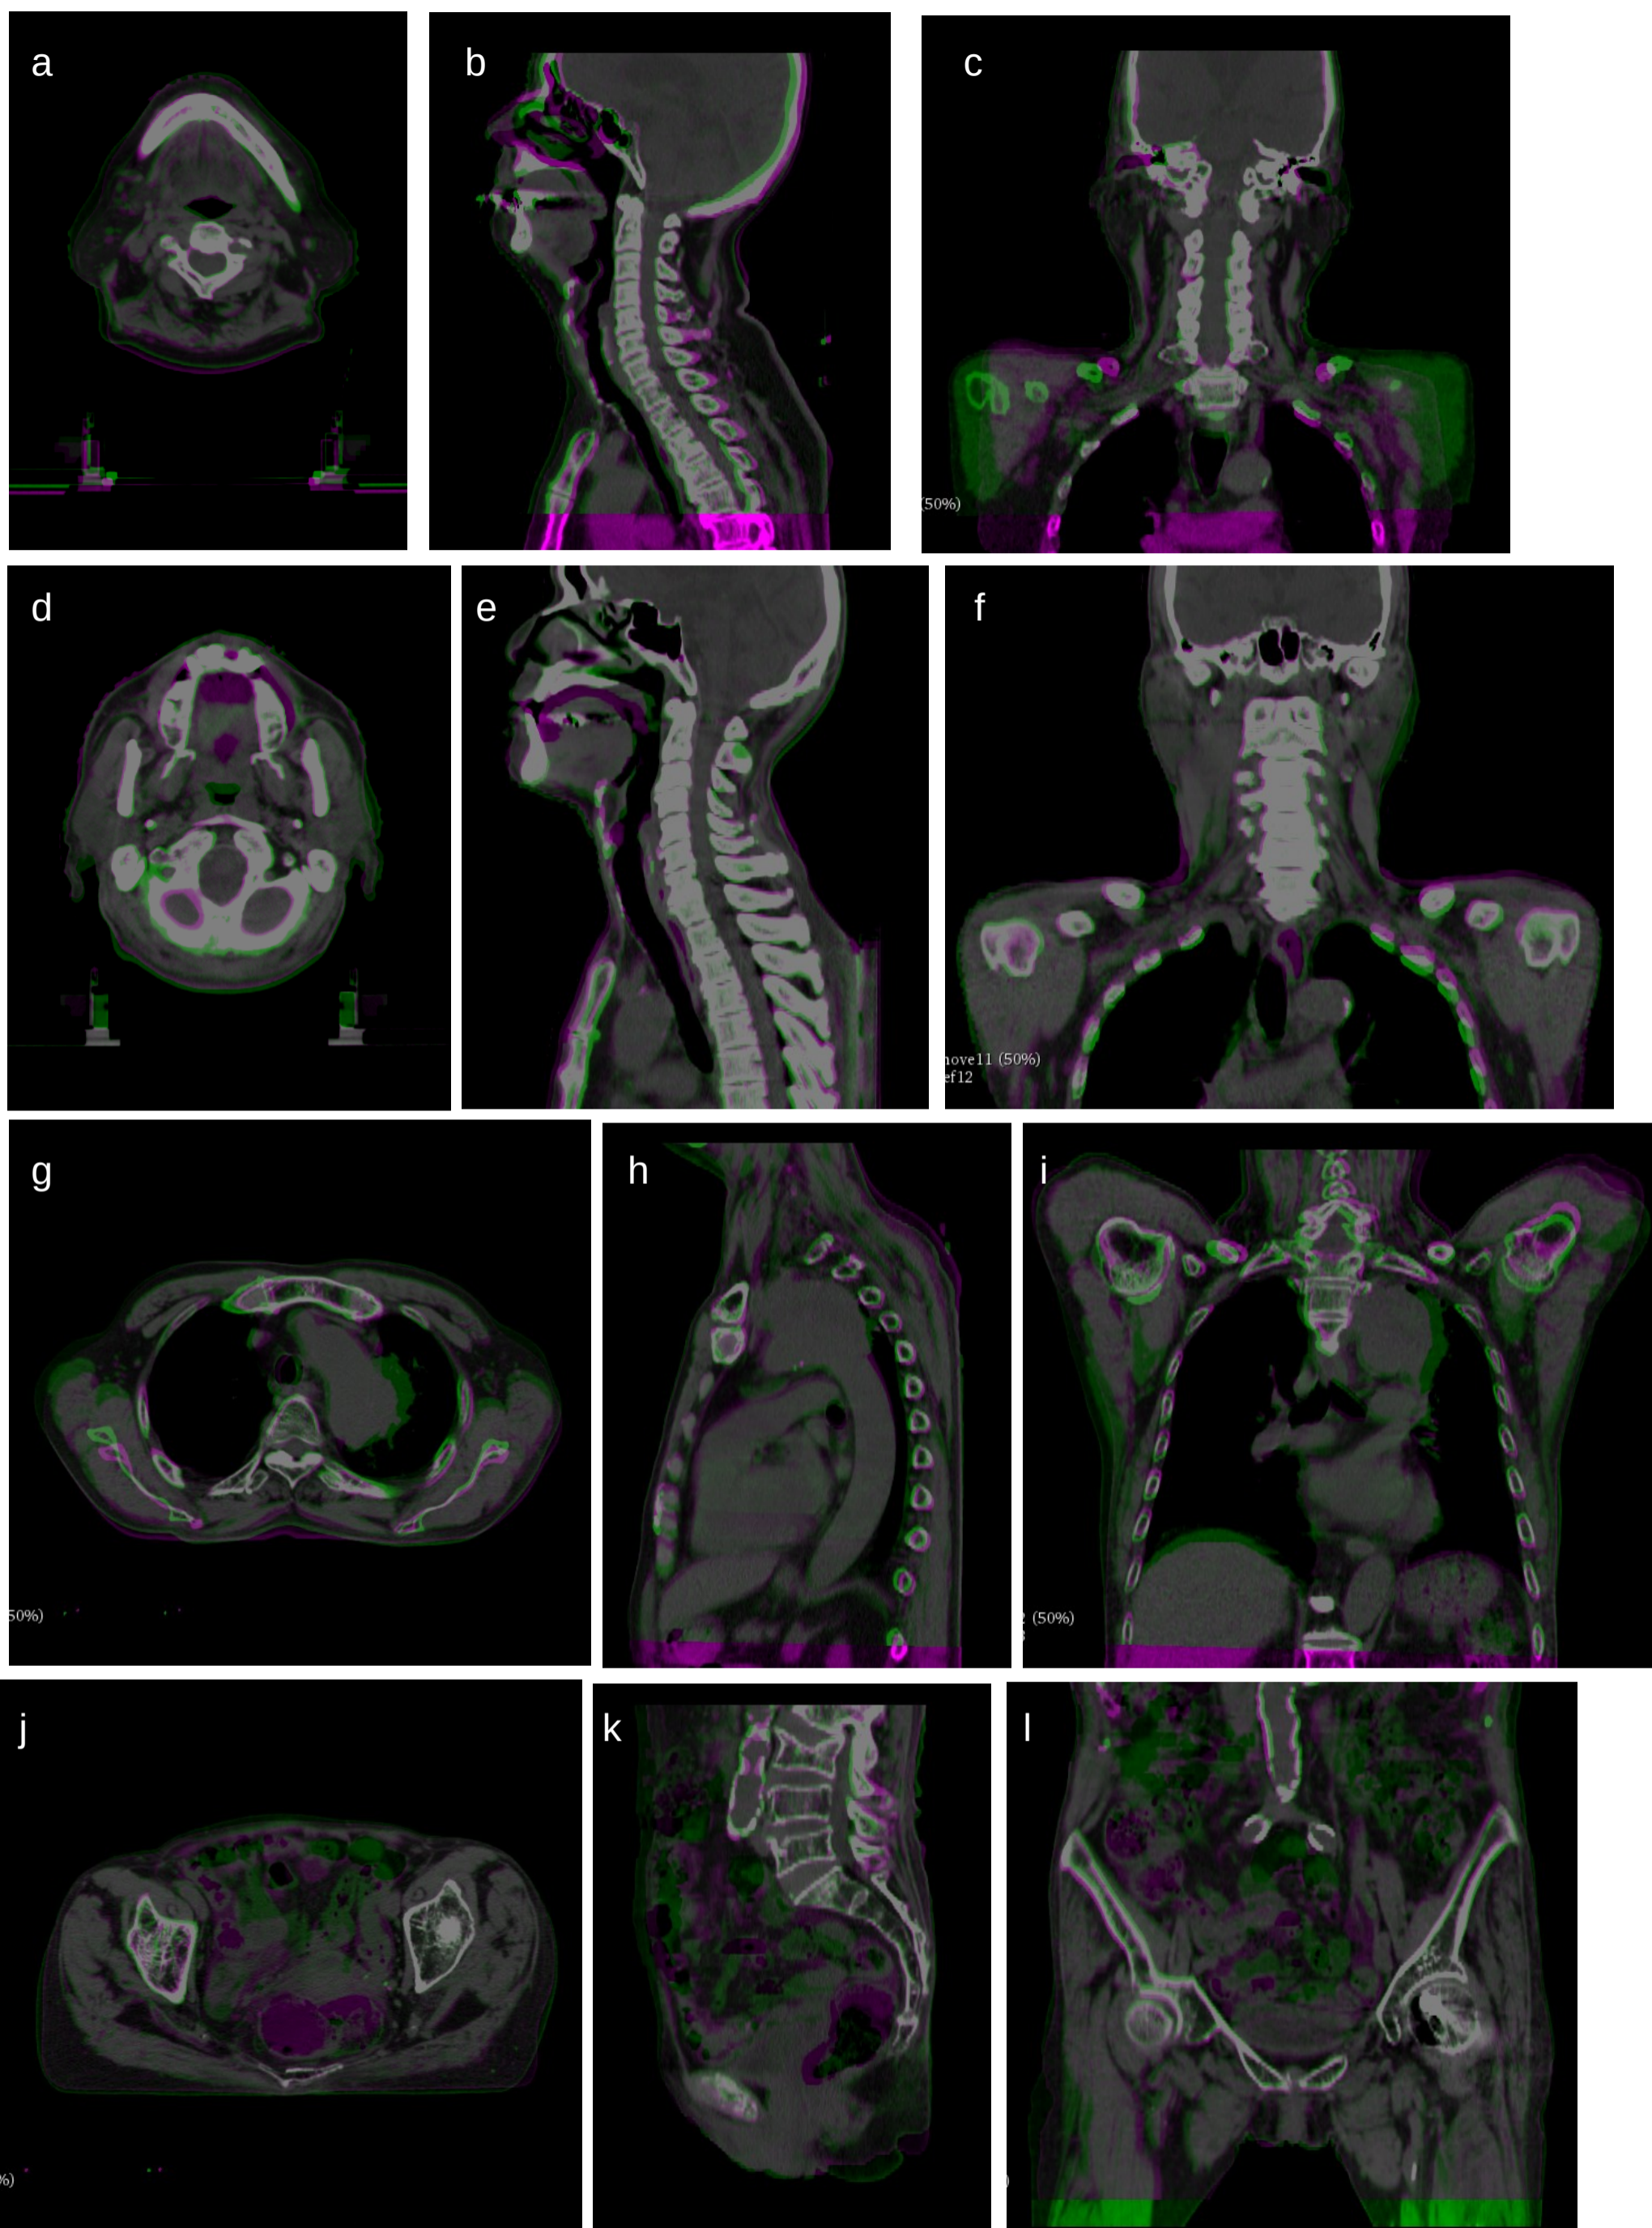

Supplementary material Figure 2 Superimposed CT images of the cases. Images (a–c) are axial, sagittal, and coronal views of the superimposed images for Case #1, images (d–f) are the same views for Case #2, images (g–i) are for Case #3 and images (j–l) are for Case #4. The moving CT images, which were used for the original radiation therapy planning, are in green and the reference CT images used for replanning are in magenta in all of the views.
