# Supplementary material for: An uncertainty metric to evaluate deformation vector fields for dose accumulation in radiotherapy
Source: PubMed Central journal article supplement — Phys Imaging Radiat Oncol. 2018 May 31;6:77–82. doi: 10.1016/j.phro.2018.05.005 (PMC7807581; doi:10.1016/j.phro.2018.05.005), 2018-05-31
Supplement: mmc3.pdf [file mmc3.pdf]

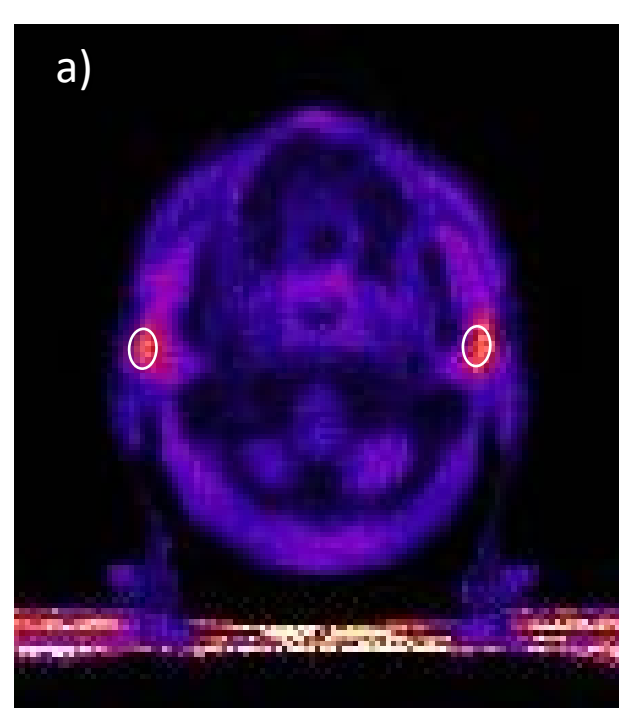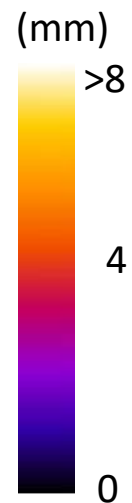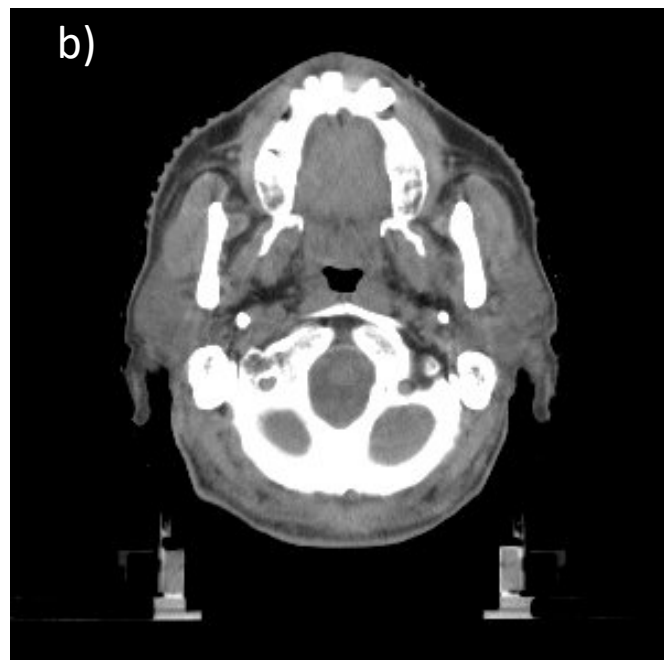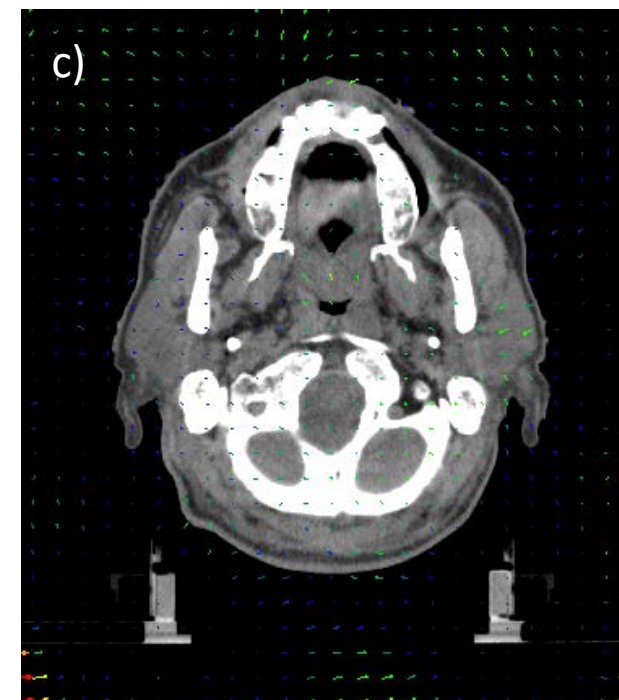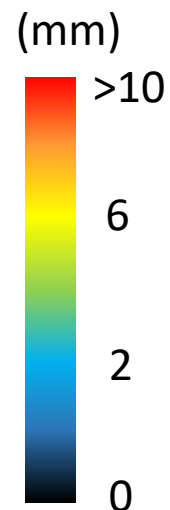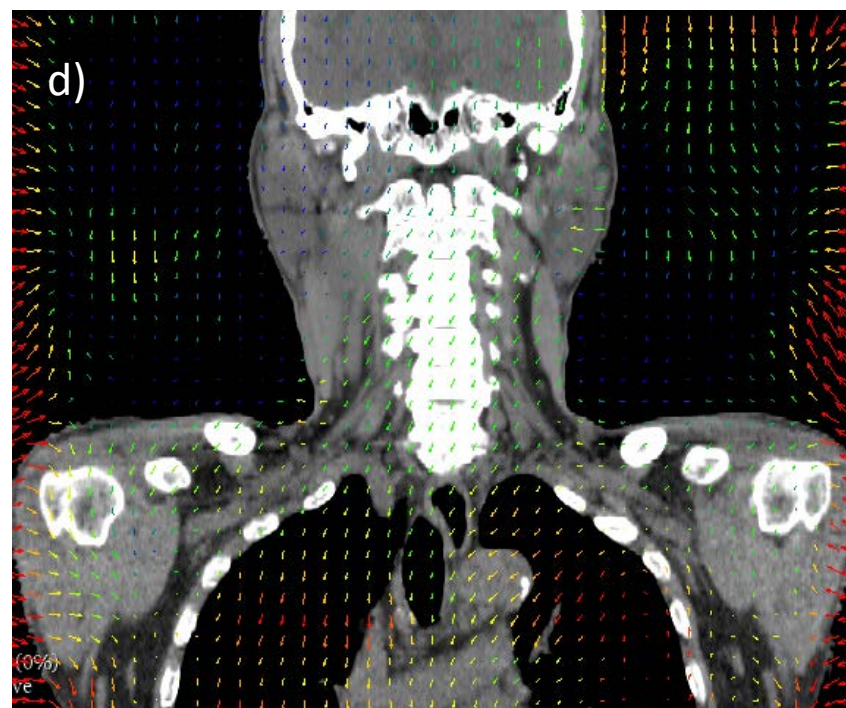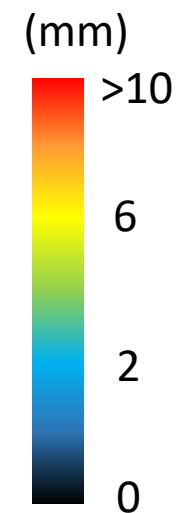

### Supplementary Material Figure 3

The LU map, the deformed image and DVF for Case #2; a) the LU map, b) the deformed image and c) the DVF on the moving images. On the LU map, the LU value was represented in color as shown by the color bar and the white circles were the ROIs for the measurement of mean LU value. The DVF was represented as color arrows on the moving images and the color showed the magnitude of deformation vector.
