# Supplementary figures and images for: An uncertainty metric to evaluate deformation vector fields for dose accumulation in radiotherapy
Source: PubMed Central journal article supplement — Phys Imaging Radiat Oncol. 2018 May 31;6:77–82. doi: 10.1016/j.phro.2018.05.005 (PMC7807581; doi:10.1016/j.phro.2018.05.005), 2018-05-31

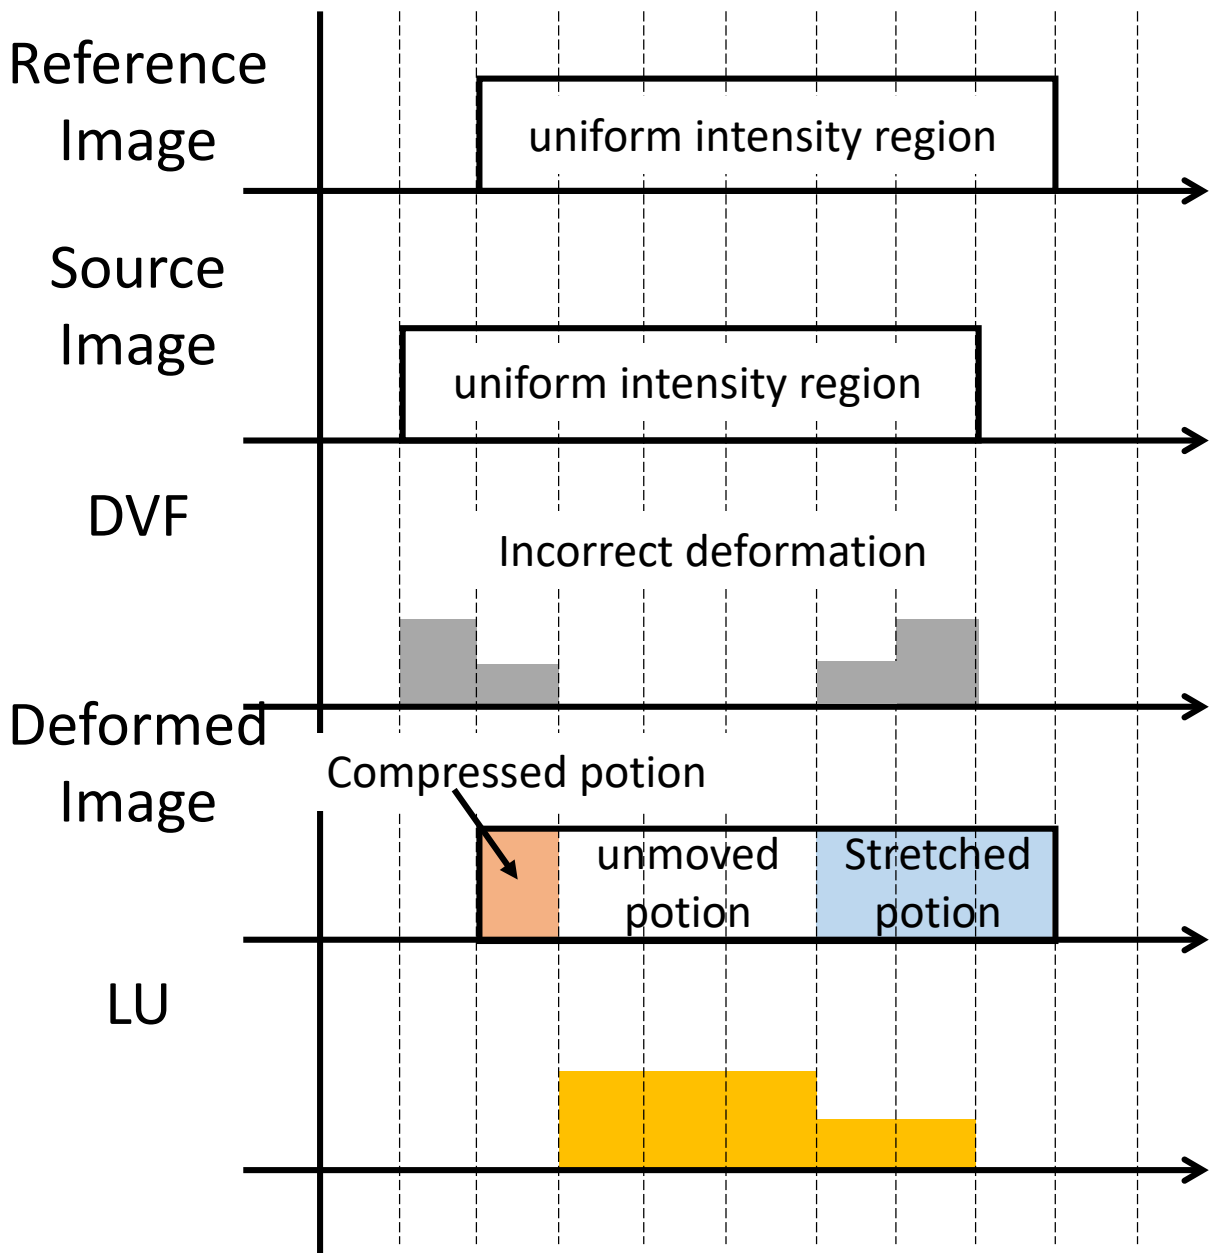

Supplementary material

Figure 1 LU for a uniform-density region with incorrect deformation

Supplement: mmc1.pdf [file mmc1.pdf]
